# Supplementary material for: Role of thiol oxidation by air in the mechanism of the self-initiated thermal thiol–ene polymerization
Source: Royal Society of Chemistry journal article supplement (doi:10.1039/d1py01301g), 2021-01-01
Supplement: d1py01301g1.pdf [file d1py01301g1.pdf]

## SUPPORTING INFORMATION for

# *Role of Thiol Oxidation by Air in the Mechanism of the Self-Initiated Thermal Thiol-ene Polymerization*

Cuong Minh Quoc Le,<sup>1,2</sup> Fabrice Morlet-Savary<sup>1,2</sup> and Abraham Chemtob<sup>1,2\*</sup>

**Thiol-ene polymerization rate.** The general thiol-ene polymerization rate expression is given below (see Cramer et al. Macromolecules 2003, 36, 7964-7969 for more details)

$$R_p = \sqrt{\frac{R_i}{2k_t}} \times \frac{1}{\sqrt{\frac{1}{(k_{add}[C=C])^2} + \frac{1}{(k_H[SH])^2} + \frac{1}{(k_{add}k_H[C=C][SH])}}}$$

$R_i$ : initiation rate

$k_t$ : rate constant for termination

$k_H$ : rate constant for H-abstraction of thiols by carbon-centered radicals

$k_{add}$ : rate constant for addition of thiyl radicals onto alkene

In the case of allyl ethers presented in the study, the addition rate constant is much greater than the H-abstraction rate constants ( $k_{add} \gg k_H$ ). For this particular case, the polymerization expression given below simplifies in a way that  $R_p$  becomes first order, and dependent only on thiol concentration (H-abstraction is the rate-limiting step).

$$R_p = \sqrt{\frac{R_i}{2k_t}} \times k_H[SH]$$

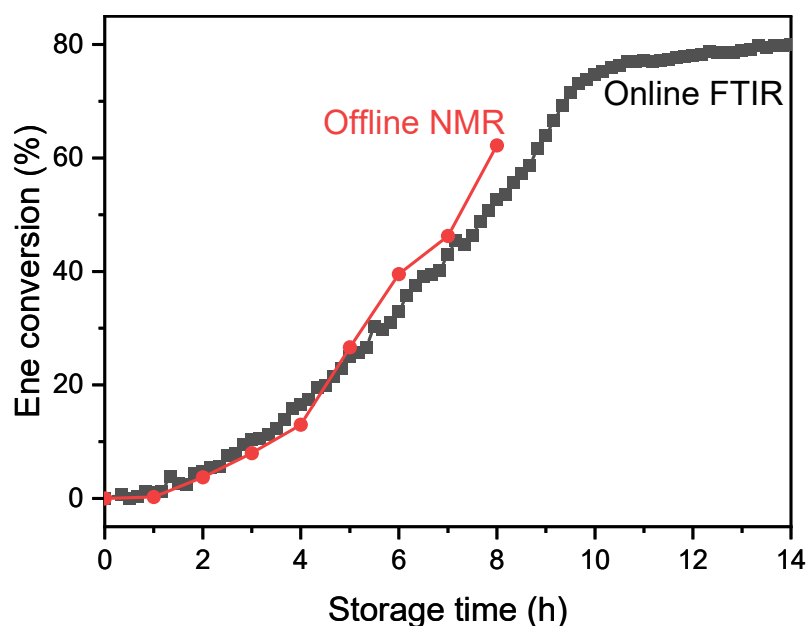

**Fig. S1.** Comparison between ene conversion determined by offline  $^1\text{H}$  NMR (dots) and online FT-NIR (squares). A stoichiometric mixture (4 g) of dithiol **3** and diene **DAP** was placed in a 10 mL vial. 0.25 mL of the mixture was transferred to a quartz cuvette with an optical path 2 mm. Ene-conversion in this cuvette was monitored online using FT-NIR spectroscopy as described in detail in the main manuscript text. Aliquots were removed from the vial at different times, then placed in a NMR tube containing  $\text{CDCl}_3$  and a  $^1\text{H}$  NMR spectrum was recorded. In this case, ene conversion was determined by comparing the integrated resonance of the methylene protons in **DAP** at 4.75 ppm and that of the same methylene protons in the polymer at 4.25 ppm.

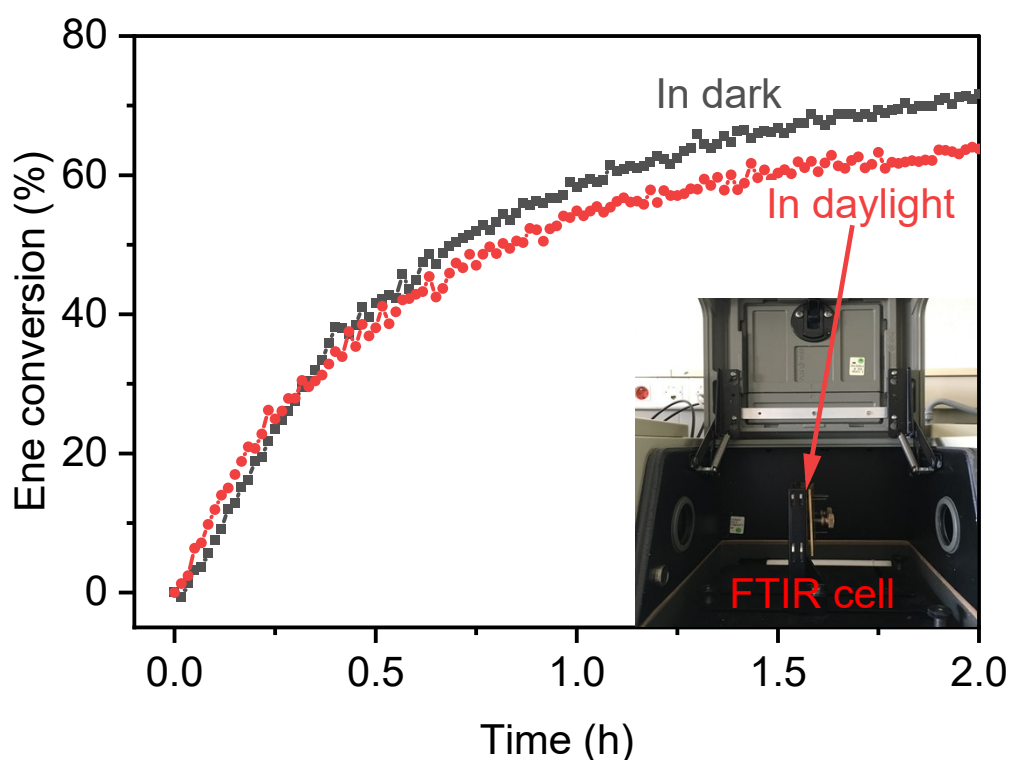

**Fig. S2.** Dependence of monomer (alkene) conversion on storage time for stoichiometric polymerization of bulk **DAA-1** performed under air. Polymerization was carried out at ambient temperature in the dark (squares) and in daylight (dots). For this latter case, the FTIR chamber was left open during the 2 hours of data acquisition (without exposure to artificial light source).

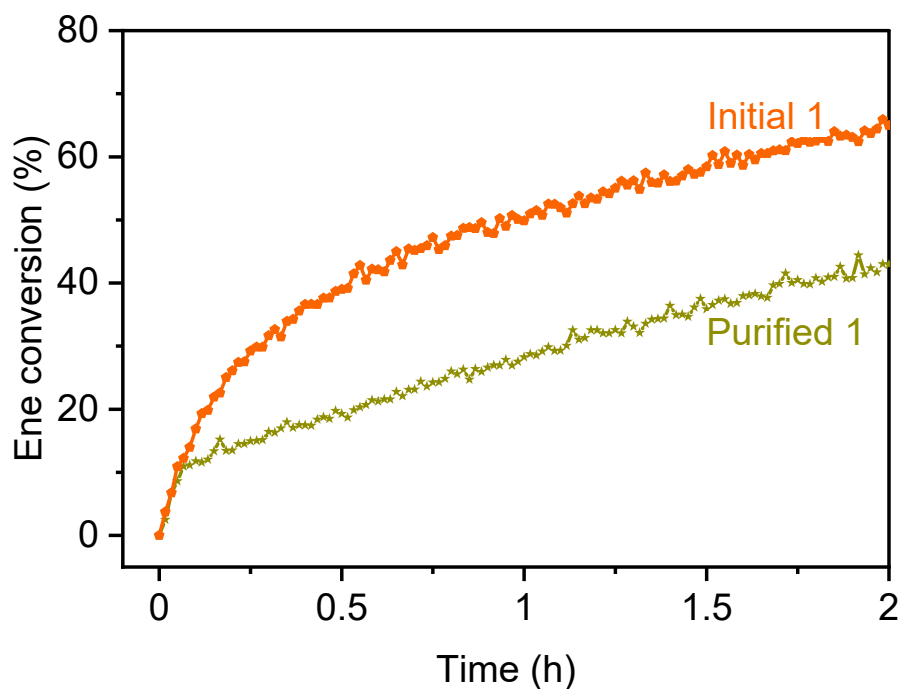

**Fig. S3.** Dependence of ene conversion versus time on the thiol stoichiometric polymerization of **DAA-1**. Dithiol **1** was purified after passing through an aluminum oxide column (activated, neutral, Brockmann I, 150 mesh, Sigma Aldrich Product number 199974). Briefly, 5 g of dithiol **1** was passed through a short column (12 mm ID) packed with 5 g of aluminum oxide.

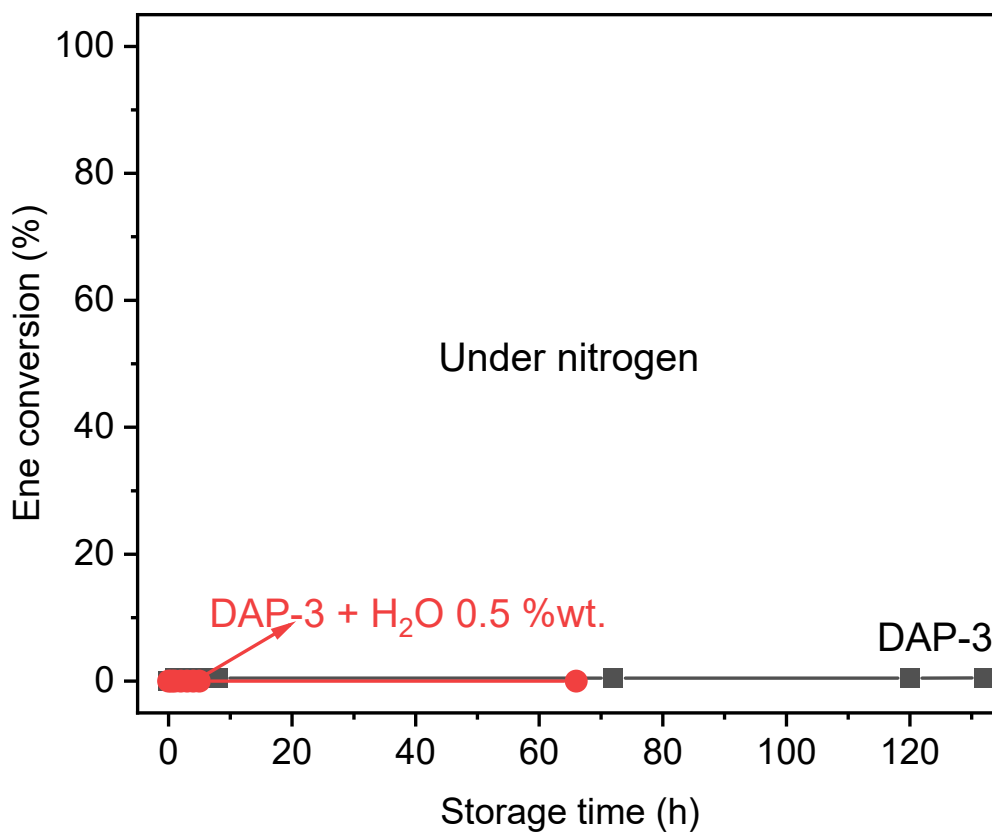

**Fig. S4.** Effect of water on the ene conversion for the self-initiated polymerization of **3-DAP** under nitrogen (<sup>1</sup>H NMR data); in the absence of water (squares), with added water (dots).

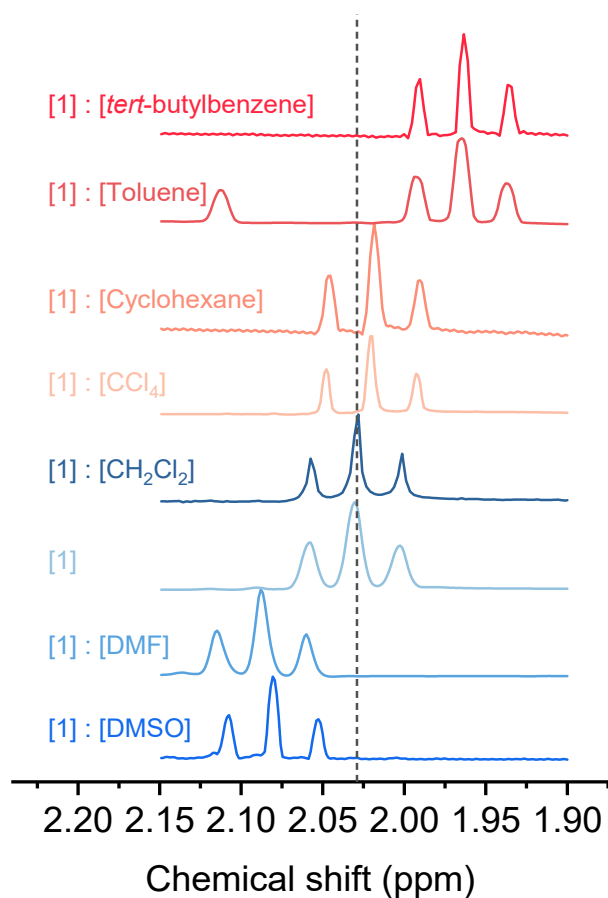

**Fig. S5.** The chemical shift of the sulfhydryl proton in thiol **1** in  $\text{CDCl}_3$  was observed after adding an excess of solvent (24 equiv). A downfield shift (DMF, DMSO) corresponds to a negative chemical shift  $\Delta\text{Hz}$ , while an upfield shift ( $\text{CCl}_4$ , toluene, *tert*-butylbenzene) corresponds to a positive chemical shift  $\Delta\text{Hz}$ .

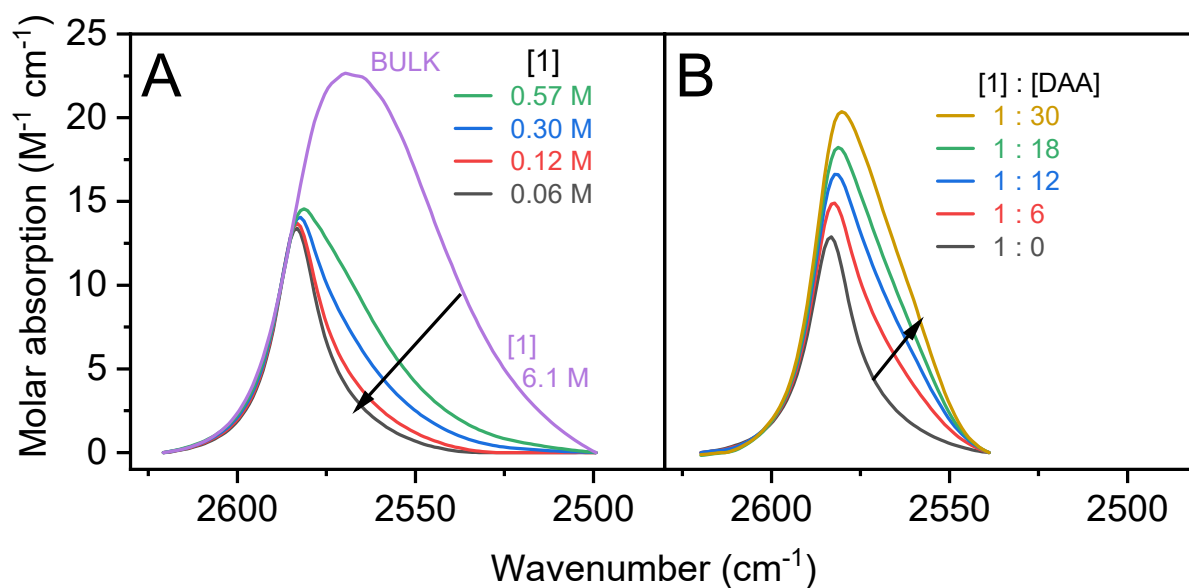

**Fig. S6.** (A) S-H stretching mode ( $\nu(\text{SH})$ ) of thiol **1** in  $\text{CCl}_4$  at different concentrations. At  $[\mathbf{1}] = 0.06 \text{ M}$ , solvent-thiol and thiol-thiol interaction are assumed to be minimal. (B) Effect of increasing amount of **DAA** on the  $\nu(\text{SH})$  of thiol **1** initially dissolved in  $\text{CCl}_4$  at  $0.06 \text{ M}$ .

### Explanation about Fig. S5.

Another approach to study the solvation of a given thiol is the examination of the effects of increasing amount of solvent (or alkene) on its FTIR spectrum. **Fig. 5A** begins by showing the S-H stretching mode ( $\nu(\text{SH})$ ) of thiol **1** without solvent. For this neat thiol, the band is centred at  $2569\text{ cm}^{-1}$  and is quite broad because of H-bonding interactions where the sulfur atom acts as the H acceptor ( $\text{SH}\cdots\text{S}$ ).<sup>1</sup> Dilution with an apolar solvent such as  $\text{CCl}_4$  causes a gradual narrowing of the S-H stretching band, as well as a marked shift to higher frequency ( $2583\text{ cm}^{-1}$ ) indicative of minimal solvent-solute interactions. These observations are consistent with the progressive disruption of hydrogen-bonded complexes between thiol molecules. Below  $0.06\text{ M}$ , the position and shape of the S-H stretching band no longer changes reflecting that most thiol molecules are thus in the monomeric (free molecules). Starting from this solution of **1** at  $0.06\text{ M}$  in  $\text{CCl}_4$ , **Fig. 5B** shows the effects of increasing amount of **DAA** on the S-H stretching mode. As more **DAA** is added, the originally sharp feature progressively broadens, moves to lower frequencies, and becomes more intense. This evolution is consistent with the formation of hydrogen bonds between the SH proton of **1** and the  $\pi$  electrons of  $\text{C}=\text{C}$  bonds of **DAA** acting as H acceptor, as already evidenced by NMR data.<sup>2</sup> Electron density transfer from olefin to the thiol causes a weakening of the S-H bond with a resultant red shift, elongation of the S-H bond and higher intensity in the SH stretching band. It should be noted that a similar trend is found when **DAA** is replaced by **DVE** and also **DAP** (**Fig. S6**). This supports the existence of analogous H-bonding interactions in other thiol-ene systems ( $\text{SH}\cdots\text{C}=\text{C}$ ) with  $\pi$  electrons acting as H acceptor.

**Experimental section - Thiol solvation by FTIR spectroscopy.** For the analysis of neat thiols, **1** was sandwiched between two quartz plates using a  $100\text{ }\mu\text{m}$  Teflon O-ring. The FTIR spectrum was recorded at room temperature on a Bruker FTIR (IFS66/s) spectrometer in the  $2000\text{--}4000\text{ cm}^{-1}$  region with a DTGS detector. For the analysis of diluted solutions,  $480\text{ }\mu\text{L}$  of  $\text{CCl}_4$  was placed in a  $2\text{-mm}$  thick quartz cuvette (volume:  $700\text{ }\mu\text{L}$ , width  $10\text{ mm}$ ) closed by a septum stopper. Known volumes of the dithiol **1** were then injected ( $5\text{--}25\text{ }\mu\text{L}$ ) into the cuvette to vary the concentration ( $0.06\text{--}0.57\text{ M}$ ). The FTIR spectra were recorded after each injection. To study the influence of the diene on the S-H stretching mode of **1**, a  $\text{CCl}_4$  solution of thiol **1** of concentration  $0.06\text{ mM}$  was placed in a  $2\text{-mm}$  thick spectroscopic cuvette. Known volumes of the diene of interest were added to the cuvette to obtain a molar excess relative to the thiol varying between 6 and 30 times. The FTIR spectra were then recorded for each injection.

**References.** **1.** J. G. David and H. E. Hallam, *Spectrochimica Acta*, 1965, **21**, 841–850. **2.** M. C. R. Symons and G. P. Archer, *J. Chem. Soc., Faraday Trans. 1*, 1988, **84**, 2499–2509.

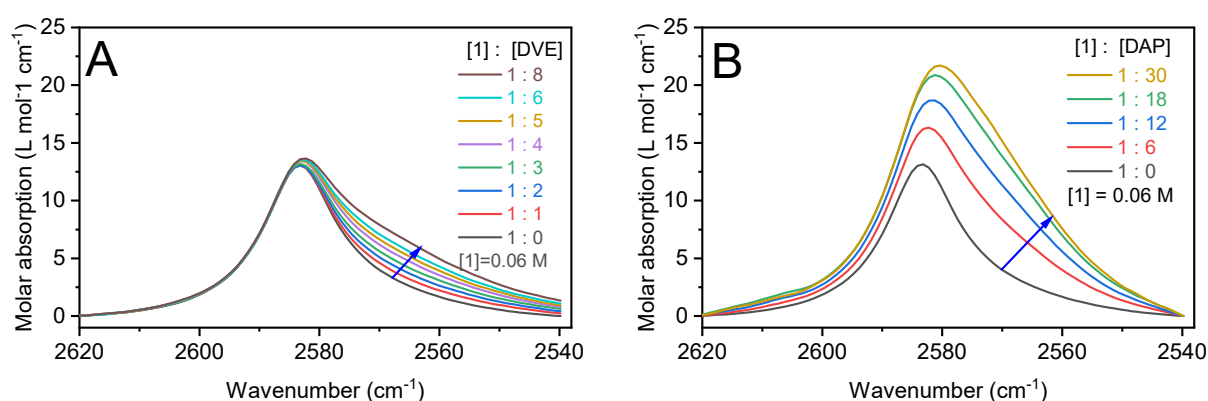

**Fig. S7.** S-H stretching mode of thiol **1** in  $\text{CCl}_4$  ( $[\textbf{1}] = 0.06\text{ M}$ ) and in the presence of an increasing concentration of DVE (**A**), or DAP (**B**). Data were presented after a background subtraction of the spectrum from a corresponding diene solution in the absence dithiol **1**.

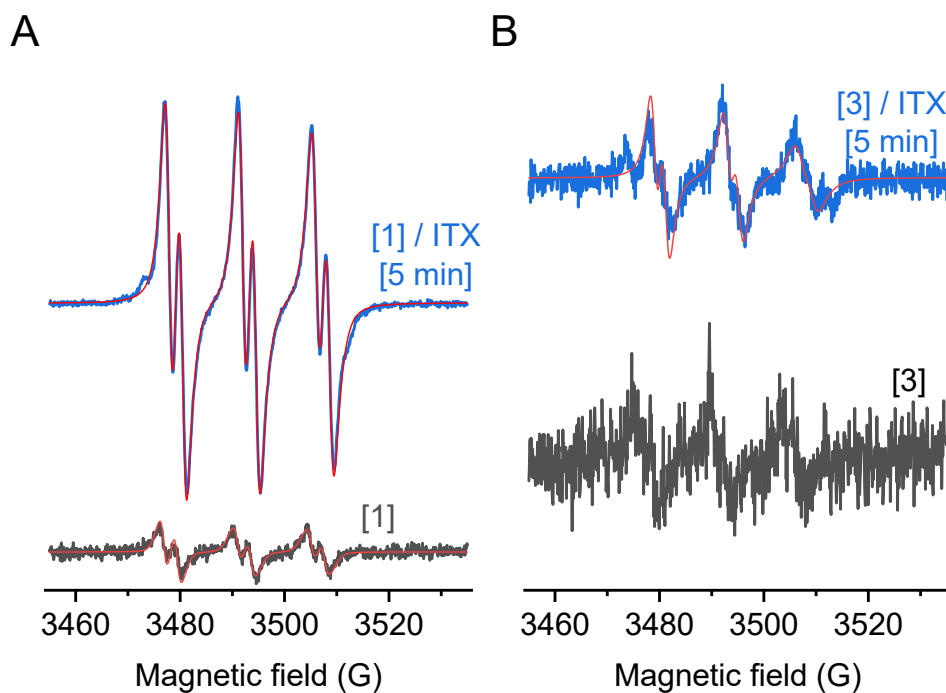

**Fig. S8.** The EPR spectra of the mixture 30 mM PBN, 100 mM thiol (**1** or **3**) in tert-butylbenzene with or without ITX (10 mM). The samples containing ITX were irradiated at 385 nm ( $2.7 \text{ mW cm}^{-2}$ ) for 5 min to generate the thiyl radical via H-abstraction. The experiment involving ITX shows a similar but increased EPR signal compared to the system without sensitizer (ITX).

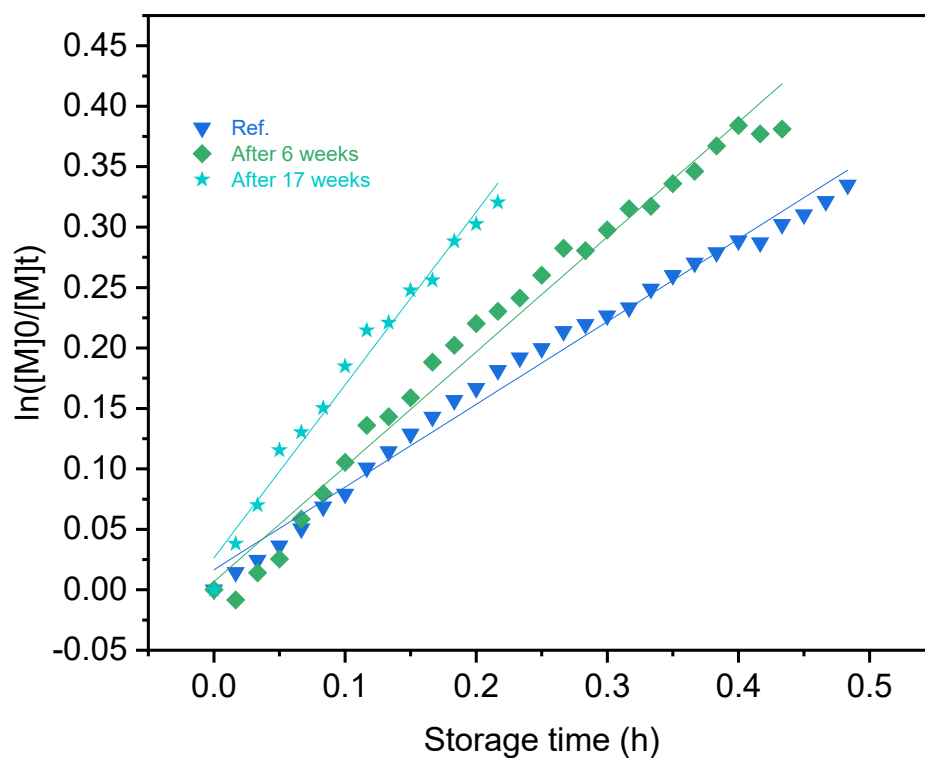

**Fig. S9.** Effect of thiol aging time on monomer (alkene) conversion for stoichiometric polymerization of bulk **DAA-1**. The experiment was performed under air and at ambient temperature **DAA** with dithiol **1**. Ref. corresponds to a freshly opened thiol bottle.

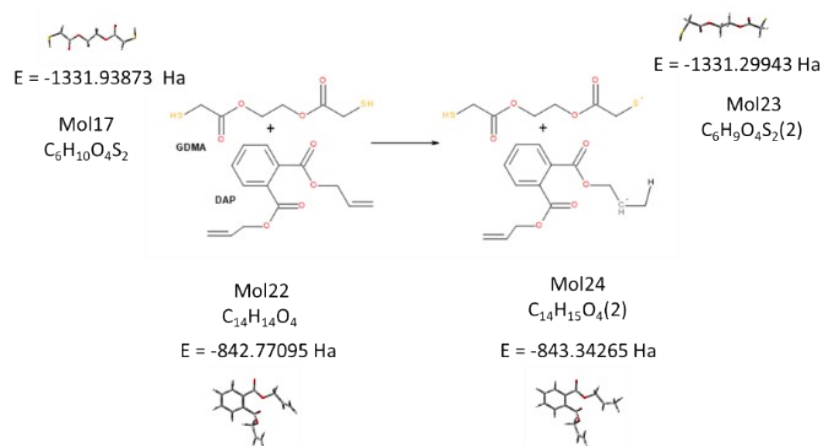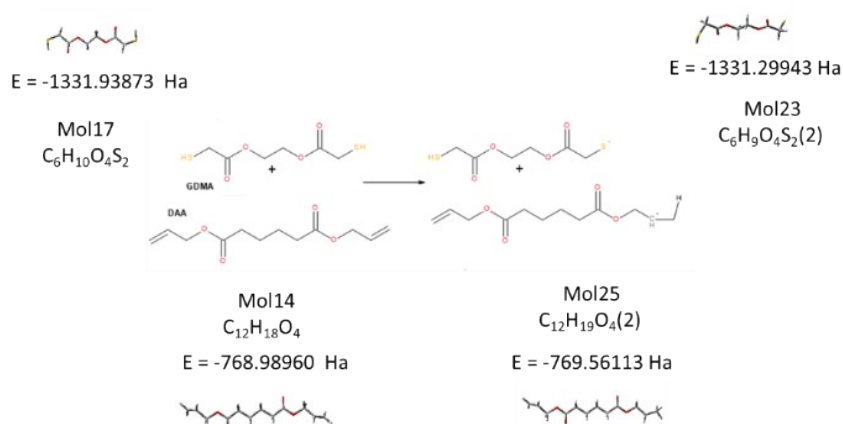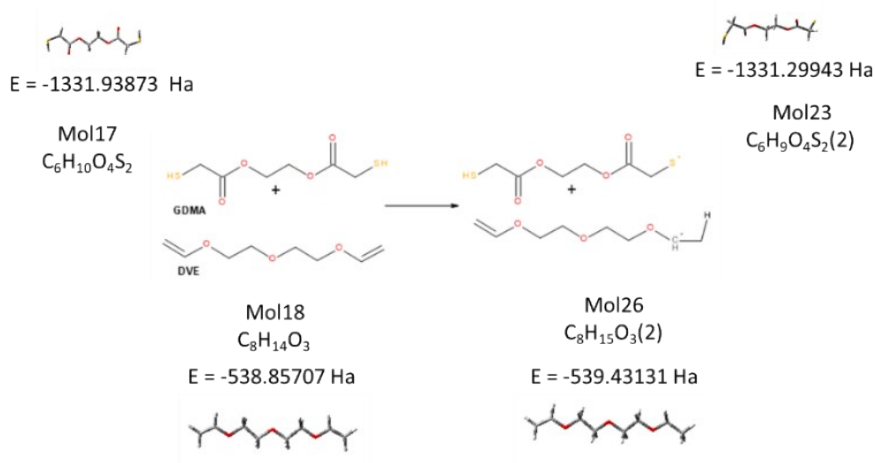

**Fig. S10.** Calculated reaction enthalpy  $\Delta_r H$  (DFT calculation, method uB3LYP - Base 6-31G\*) for MAH of thiol **1** by alkene **DAA**, **DAP** and **DVE**. It is found that the reaction enthalpy of a H-atom transfer of thiol **1** to alkene amounts to  $\Delta_r H_{298} \approx 42 \text{ kcal/mol}$  and does not vary significantly with the nature of the alkene.

**Table S1.** Dependence of self-initiated polymerization rate of **DAA-1** (1:1 equiv) on impurities (relative to polymerization rate of a system without solvent). Dibutyl disulfide (TCI, > 98.5%), cumyl hydroperoxide (TCI, 80.5%), copper (II) sulfate pentahydrate (Carl Roth, >99%) were used as impurities.

| Run                              | Concentration of impurity (M) | Relative $R_p$ ( $h^{-1}$ ) <sup>a</sup> |
|----------------------------------|-------------------------------|------------------------------------------|
| Bulk <b>DAA-1</b><br>(Reference) | -                             | $1 \pm 0.2$                              |
| + Water                          | 0.52                          | $5.5 \pm 0.2$                            |
| + Dibutyl disulfide              | 0.05                          | $0.8 \pm 0.2$                            |
| + Cumyl hydroperoxide            | 0.10                          | $1.1 \pm 0.2$                            |
| + $Cu^{2+}$                      | $1.56 \times 10^{-5}$         | $6.8 \pm 0.2$                            |

<sup>a</sup> Relative to the polymerization rate in bulk
